# Supplementary material
Source: PubMed Central journal article supplement (PMC9199585)
Supplement: NIHMS1700861-supplement-Supplemental_Table_1.pdf [file NIHMS1700861-supplement-Supplemental_Table_1.pdf]

| Loss of Consciousness (LoC) over 5 Hits |          |               |               |               |               |               |
|-----------------------------------------|----------|---------------|---------------|---------------|---------------|---------------|
| Group                                   | Mouse ID | Hit 1 LoC (s) | Hit 2 LoC (s) | Hit 3 LoC (s) | Hit 4 LoC (s) | Hit 5 LoC (s) |
| Injured                                 | Mouse 1  | 66            | 78            | 79            | 98            | 110           |
|                                         | Mouse 2  | 54            | 72            | 63            | 82            | 80            |
|                                         | Mouse 3  | 60            | 84            | 99            | 110           | 114           |
| Sham                                    | Mouse 4  | 62            | 53            | 58            | 60            | 55            |
|                                         | Mouse 5  | 49            | 57            | 53            | 48            | 58            |
|                                         | Mouse 6  | 50            | 47            | 57            | 60            | 50            |

**Supplemental Table 1.** Representative loss of consciousness data for 6 mice (3 injured, 3 sham) over the course of 5 injuries, spaced once daily. Data represents time in seconds for each mouse to regain righting reflex after removal from anesthesia. Injured mice were subject to our weight-drop model of mild traumatic brain injury (**Section 1.**) while sham mice were simply exposed to anesthesia for the same duration. Sham mice show no increase in loss of consciousness with once-daily exposure to anesthesia. Injured mice show increases in loss of consciousness with each successive injury – however, to date we have not seen loss of consciousness correlate with functional outcome.
